# Supplementary material for: Chemically stable fluorescent anti-counterfeiting labels achieved by UV-induced photolysis of nanocellulose
Source: Royal Society of Chemistry journal article supplement (doi:10.1039/d1ra02089g), 2021-01-01
Supplement: d1ra02089g1.pdf [file d1ra02089g1.pdf]

## Supporting information

### **Chemically stable fluorescent anti-counterfeiting labels achieved by UV-induced photolysis of nanocellulose**

Hongrui Cheng<sup>a †</sup>, Xiaofeng Wei<sup>b †</sup>, Haijiang Qiu<sup>a</sup>, Wensong Wang<sup>a</sup>, Wenyue Su<sup>a \*</sup>,  
Yuanhui Zheng<sup>a c \*</sup>

<sup>a</sup> College of Chemistry, Fuzhou University, Fuzhou 350116, China.

<sup>b</sup> National Engineering Research Center of Chemical Fertilizer Catalyst Fuzhou University Fuzhou, 350002, PR China

<sup>c</sup> Fujian Science & Technology Innovation Laboratory for Optoelectronic Information, 350116, China.

† These authors contributed equally to this work

\* Corresponding author: suweny@fzu.edu.cn; Yuanhui.Zheng@fzu.edu.cn

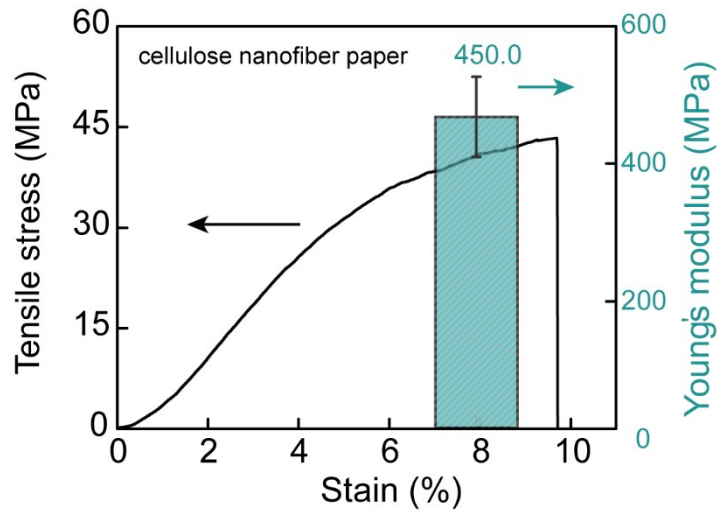

**Fig. S1.** Tensile stress-strain curve and Young's modulus of the cellulose nanofiber paper.

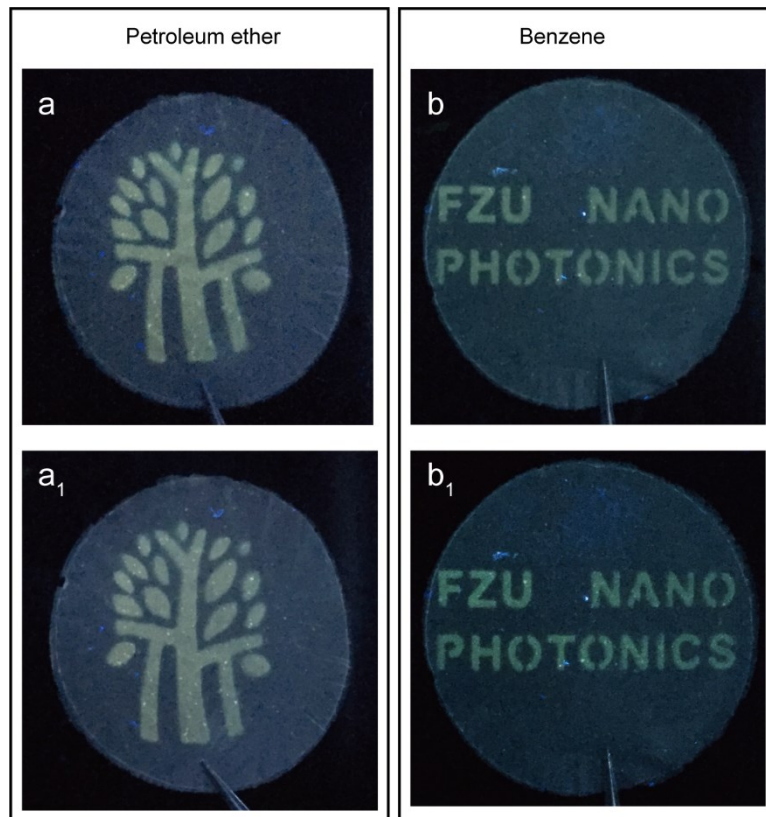

**Fig. S2.** The photography of cellulose nanofiber papers immersed in different organic solvents, before (the first row), after (the second row).

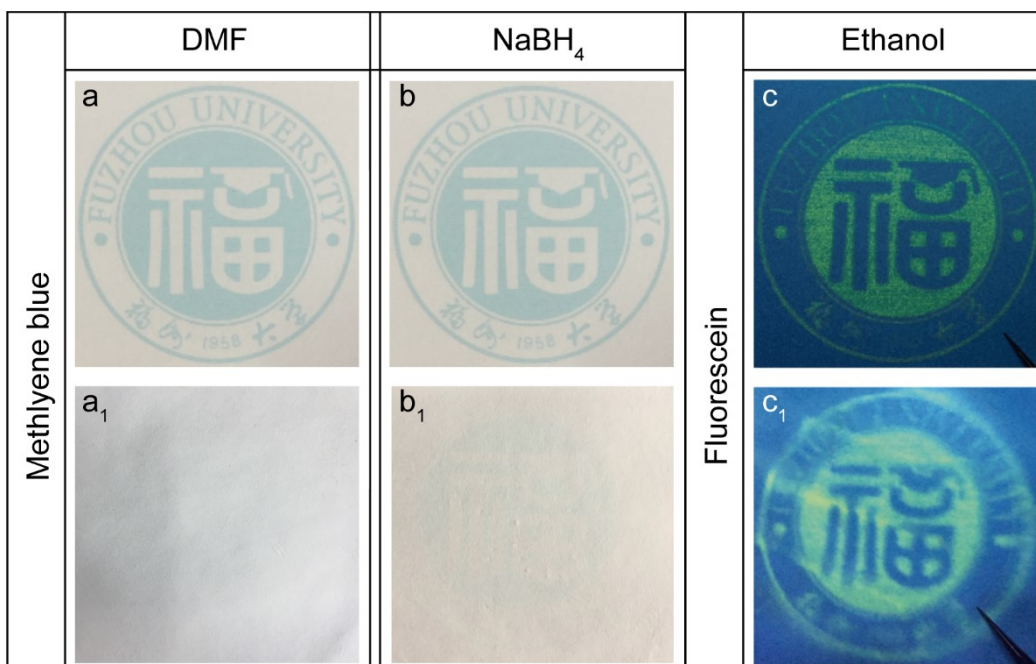

**Fig. S3.** The logo of Fuzhou university printed by methylene blue before (a) and after (a<sub>1</sub>) immersed in DMF under natural light; before (b) and after (b<sub>1</sub>) dealt with NaBH<sub>4</sub> under natural light. The logo printed by fluorescein dye before (c) and after (c<sub>1</sub>) immersed in ethanol under 365 nm UV light.

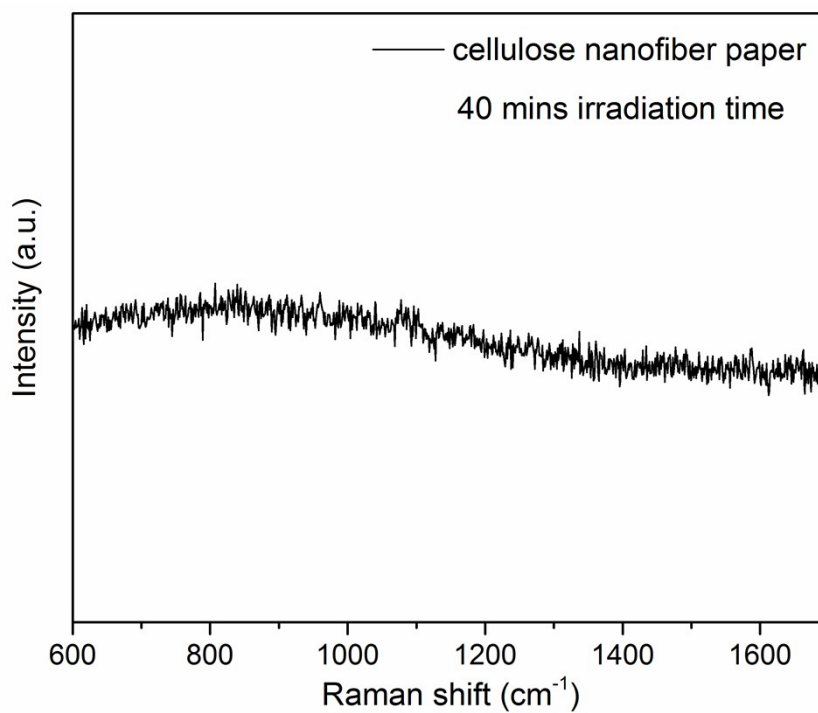

**Fig. S4.** The Raman spectrum of cellulose nanofiber paper after UV irradiation.
